# Supplementary material
Source: PubMed Central journal article supplement (PMC2667073)
Supplement: 0810094106_Appendix_PDF.pdf [file 0810094106_Appendix_PDF.pdf]

Table S1. Mass spectroscopic identification of RhoGDI2 immunocomplex partners from Flag immunoprecipitation and elution

| Protein                                   | ACC           | # expts  | total peptides |
|-------------------------------------------|---------------|----------|----------------|
| P09493-4                                  | P09493        | 2        | 11             |
| Q8N274 Hypothetical protein FL            | Q8N274        | 2        | 11             |
| <b>GDIS_HUMAN Rho GDP-dissociatio</b>     | <b>P52566</b> | <b>2</b> | <b>9</b>       |
| TMO3_HUMAN Ubiquitous tropomod            | Q9NYL9        | 2        | 6              |
| ACTS_HUMAN Actin, alpha skelet            | P02568        | 1        | 5              |
| ADT2_HUMAN ADP,ATP carrier pro            | P05141        | 2        | 5              |
| ELM2_HUMAN Engulfment and cell            | Q96JJ3        | 1        | 5              |
| CALM_HUMAN Calmodulin                     | P02593        | 2        | 4              |
| <b>RHOA_HUMAN TRANSFORMING<br/>PROTEI</b> | <b>P06749</b> | <b>2</b> | <b>4</b>       |
| PDI2_HUMAN Protein-arginine de            | Q9Y2J8        | 2        | 3              |
| RIB2_HUMAN Dolichyl-diphosphoo            | P04844        | 2        | 3              |
| TRAL_HUMAN Heat shock protein             | Q12931        | 2        | 3              |
| AR21_HUMAN ARP2/3 complex 21 k            | O15145        | 2        | 2              |
| G3P2_HUMAN Glyceraldehyde 3-ph            | P04406        | 1        | 2              |
| HRA1_HUMAN Serine protease HTR            | Q92743        | 2        | 2              |
| huntingtin interacting protei             | NP_036403     | 2        | 2              |
| IF36_HUMAN Eukaryotic translat            | Q64252        | 1        | 2              |
| KIAA0377 gene product [Homo s             | NP_055474     | 2        | 2              |
| KIAA0418 gene product [Homo s             | NP_055446     | 2        | 2              |
| low density lipoprotein-relat             | NP_061027     | 1        | 2              |
| MTR2_HUMAN Myotubularin-relate            | Q13614        | 2        | 2              |
| Myc-binding protein-associate             | NP_115509     | 2        | 2              |
| P20849-2                                  | P20849        | 2        | 2              |
| PCNA_HUMAN Proliferating cell             | P12004        | 2        | 2              |
| Q00987-4                                  | Q00987        | 2        | 2              |
| Q9UQB3-2                                  | Q9UQB3        | 1        | 2              |
| RAB guanine nucleotide exchan             | NP_055319     | 1        | 2              |
| repressor of estrogen recepto             | NP_009204     | 2        | 2              |
| S111_HUMAN Calcizzarin (S100C             | P31949        | 1        | 2              |
| S3B3_HUMAN Splicing factor 3B             | Q15393        | 2        | 2              |
| SQRD_HUMAN Sulfide:quinone oxi            | Q9Y6N5        | 2        | 2              |
| <b>SRC_HUMAN, [Schmidt-Ruppin A-2</b>     | <b>P12931</b> | <b>2</b> | <b>2</b>       |
| SSB_HUMAN Single-stranded DNA-            | Q04837        | 2        | 2              |
| TBA4_HUMAN Tubulin alpha-4 cha            | P05215        | 2        | 2              |
| TPM2_HUMAN Tropomyosin beta ch            | P07951        | 2        | 2              |
| tubulin beta-5 [Homo sapiens]             | NP_115914     | 2        | 2              |
| ubiquitin protein ligase [Hom             | NP_569733     | 2        | 2              |
| <b>VAV_HUMAN guanine nucleo</b>           | <b>P15498</b> | <b>2</b> | <b>2</b>       |

|                                |           |   |   |
|--------------------------------|-----------|---|---|
| 143B_HUMAN 14-3-3 protein beta | P31946    | 1 | 1 |
| 2-aminoadipic 6-semialdehyde   | NP_861522 | 1 | 1 |
| 4F2_HUMAN 4F2 cell-surface ant | P08195    | 1 | 1 |
| A4E1_HUMAN Adapter-related pro | Q9UPM8    | 1 | 1 |
| AAAT_HUMAN Neutral amino acid  | Q15758    | 1 | 1 |
| ACTY_HUMAN Beta-contrastin (Ac | P42025    | 1 | 1 |
| ADAM-TS related protein 1 iso  | NP_644669 | 1 | 1 |
| adenosine deaminase, tRNA-spe  | NP_036223 | 1 | 1 |
| adlican [Homo sapiens]         | NP_056234 | 1 | 1 |
| AF4_HUMAN AF-4 protein (Proto- | P51825    | 1 | 1 |
| ANK3_HUMAN Ankyrin 3 (ANK-3) ( | Q12955    | 1 | 1 |
| APB_HUMAN Apolipoprotein B-100 | P04114    | 1 | 1 |
| apoptosis regulator [Homo sap  | NP_057645 | 1 | 1 |
| apurinic/apurimidinic endonuc  | NP_055296 | 1 | 1 |
| ARF4_HUMAN ADP-ribosylation fa | P18085    | 1 | 1 |
| ataxin 2; olivopontocerebella  | NP_002964 | 1 | 1 |
| ATPD_HUMAN ATP synthase delta  | P30049    | 1 | 1 |
| ATS9_HUMAN ADAMTS-9 precursor  | Q9P2N4    | 1 | 1 |
| AVR2_HUMAN Activin receptor ty | P27037    | 1 | 1 |
| BASP_HUMAN Brain acid soluble  | P80723    | 1 | 1 |
| BTF3_HUMAN Transcription facto | P20290    | 1 | 1 |
| C10ORF6 [Homo sapiens]         | NP_060591 | 1 | 1 |
| cancer/testis antigen gene 1   | NP_786887 | 1 | 1 |
| cask-interacting protein 2 [H  | NP_065804 | 1 | 1 |
| CAV1_HUMAN Caveolin-1          | Q03135    | 1 | 1 |
| CCG8_HUMAN Voltage-dependent c | Q8WXS5    | 1 | 1 |
| CD59_HUMAN CD59 glycoprotein p | P13987    | 1 | 1 |
| CDS2_HUMAN Phosphatidate cytid | O95674    | 1 | 1 |
| chromosome 20 open reading fr  | NP_054864 | 1 | 1 |
| chromosome 9 open reading fra  | NP_114401 | 1 | 1 |
| CMC1_HUMAN Calcium-binding mit | O75746    | 1 | 1 |
| CMC2_HUMAN Calcium-binding mit | Q9UJS0    | 1 | 1 |
| CO1C_HUMAN Coronin 1C (Coronin | Q9ULV4    | 1 | 1 |
| COA2_HUMAN Acetyl-CoA carboxyl | O00763    | 1 | 1 |
| CPS1_HUMAN Cytochrome P450 XXI | P08686    | 1 | 1 |
| CPT7_HUMAN Cytochrome P450 17A | P05093    | 1 | 1 |
| CT4B_HUMAN Hypothetical protei | Q9UKD6    | 1 | 1 |
| CTOG_HUMAN CH-TOG protein (Col | Q14008    | 1 | 1 |
| cyclin B3 isoform 3 [Homo sap  | NP_149020 | 1 | 1 |
| DAPK_HUMAN Death-associated pr | P53355    | 1 | 1 |
| DCT2_HUMAN Dynactin complex 50 | Q13561    | 1 | 1 |
| DD25_HUMAN ATP-dependent RNA h | Q9UHL0    | 1 | 1 |
| DEAH (Asp-Glu-Ala-His) box po  | NP_064547 | 1 | 1 |

|                                |           |   |   |
|--------------------------------|-----------|---|---|
| dendritic cell protein [Homo   | NP_006351 | 1 | 1 |
| disrupted in renal carcinoma   | NP_443184 | 1 | 1 |
| DKFZP434B168 protein [Homo sa  | NP_056249 | 1 | 1 |
| DKFZp586F1019 protein [Homo s  | NP_056423 | 1 | 1 |
| DNA polymerase delta p38 subu  | NP_056399 | 1 | 1 |
| DNA-crosslink repair gene SNM  | NP_055696 | 1 | 1 |
| DNL1_HUMAN DNA ligase I (Polyd | P18858    | 1 | 1 |
| DOC6_HUMAN Deducator of cytoki | Q96HP0    | 1 | 1 |
| DSPP_HUMAN Dentin sialophospho | Q9NZW4    | 1 | 1 |
| EF1G_HUMAN Elongation factor 1 | P26641    | 1 | 1 |
| EL1_HUMAN Elastase 1 precursor | Q9UNI1    | 1 | 1 |
| ELL2_HUMAN RNA polymerase II e | O00472    | 1 | 1 |
| EML1_HUMAN Echinoderm microtub | O00423    | 1 | 1 |
| EP42_HUMAN Erythrocyte membran | P16452    | 1 | 1 |
| esophageal cancer associated   | NP_064710 | 1 | 1 |
| ET1R_HUMAN Endothelin-1 recept | P25101    | 1 | 1 |
| far upstream element-binding   | NP_003893 | 1 | 1 |
| FAS_HUMAN Fatty acid synthase  | P49327    | 1 | 1 |
| FAT2_HUMAN Protocadherin Fat 2 | Q9NYQ8    | 1 | 1 |
| FATH_HUMAN Cadherin-related tu | Q14517    | 1 | 1 |
| FGFI_HUMAN Fibroblast growth f | O76093    | 1 | 1 |
| filaggrin [Homo sapiens]       | XP_048104 | 1 | 1 |
| FSL1_HUMAN Follistatin-related | Q12841    | 1 | 1 |
| gamma-glutamyltransferase-lik  | NP_563577 | 1 | 1 |
| GAS1_HUMAN Growth-arrest-speci | P54826    | 1 | 1 |
| GBB2_HUMAN Guanine nucleotide- | P11016    | 1 | 1 |
| GBX2_HUMAN Homeobox protein GB | P52951    | 1 | 1 |
| gemin 6 [Homo sapiens]         | NP_079051 | 1 | 1 |
| GS1_HUMAN GS1 protein          | Q08623    | 1 | 1 |
| H-2K binding factor-2 [Homo s  | NP_056958 | 1 | 1 |
| HIV-1 Rev binding protein-lik  | NP_006067 | 1 | 1 |
| HXB3_HUMAN Homeobox protein Ho | P14651    | 1 | 1 |
| IBA4_HUMAN ITBA4 protein       | O15226    | 1 | 1 |
| IF39_HUMAN Eukaryotic translat | P55884    | 1 | 1 |
| IF3A_HUMAN Eukaryotic translat | Q14152    | 1 | 1 |
| IF4N_HUMAN Eukaryotic initiati | P38919    | 1 | 1 |
| IMMT_HUMAN Mitochondrial inner | Q16891    | 1 | 1 |
| importin 4 [Homo sapiens]      | NP_078934 | 1 | 1 |
| ISL2_HUMAN Insulin gene enhanc | Q96A47    | 1 | 1 |
| JAW1-related protein isoform   | NP_006060 | 1 | 1 |
| Kaiso [Homo sapiens]           | NP_006768 | 1 | 1 |
| KF3B_HUMAN Kinesin-like protei | O15066    | 1 | 1 |
| KHLX_HUMAN Kelch-like protein  | Q9Y2M5    | 1 | 1 |

|                                |           |   |   |
|--------------------------------|-----------|---|---|
| KIAA0170 gene product; nuclea  | NP_055456 | 1 | 1 |
| KIAA0354 gene product [Homo s  | NP_055687 | 1 | 1 |
| KIAA0590 gene product [Homo s  | NP_055529 | 1 | 1 |
| KIAA0625 protein [Homo sapien  | NP_055861 | 1 | 1 |
| KIAA0753 gene product [Homo s  | NP_055619 | 1 | 1 |
| KIAA0844 protein [Homo sapien  | NP_055766 | 1 | 1 |
| KIAA0903 protein [Homo sapien  | NP_056067 | 1 | 1 |
| LAP (leucine-rich repeats and  | NP_079444 | 1 | 1 |
| LDHB_HUMAN L-lactate dehydroge | P07195    | 1 | 1 |
| LDHL_HUMAN L-lactate dehydroge | Q9BYZ2    | 1 | 1 |
| leucine zipper, putative tumo  | NP_066300 | 1 | 1 |
| likely ortholog of mouse ubiq  | NP_071349 | 1 | 1 |
| LMB1_HUMAN Laminin beta-1 chai | P07942    | 1 | 1 |
| LOL1_HUMAN Lysyl oxidase homol | Q08397    | 1 | 1 |
| ME18_HUMAN DNA-binding protein | P35227    | 1 | 1 |
| METK_HUMAN S-adenosylmethionin | P31153    | 1 | 1 |
| MGL2_HUMAN MAGE-like protein 2 | Q9UJ55    | 1 | 1 |
| mitochondrial ribosomal prote  | NP_071383 | 1 | 1 |
| mitochondrial ribosomal prote  | NP_078816 | 1 | 1 |
| MN1_HUMAN Probable tumor suppr | Q10571    | 1 | 1 |
| monogenic, audiogenic seizure  | NP_115495 | 1 | 1 |
| MRP_HUMAN MARCKS-related prote | P49006    | 1 | 1 |
| myopalladin [Homo sapiens]     | NP_115967 | 1 | 1 |
| MYST histone acetyltransferas  | NP_008998 | 1 | 1 |
| NAB1_HUMAN NGFI-A binding prot | Q13506    | 1 | 1 |
| NC5R_HUMAN NADH-cytochrome b5  | P00387    | 1 | 1 |
| nemo-like kinase; likely orth  | NP_057315 | 1 | 1 |
| NHPX_HUMAN NHP2-like protein 1 | P55769    | 1 | 1 |
| ninein (GSK3B interacting pro  | NP_065972 | 1 | 1 |
| NISM_HUMAN NADH-ubiquinone oxi | O43674    | 1 | 1 |
| NO56_HUMAN Nucleolar protein N | O00567    | 1 | 1 |
| NPL4_HUMAN Nucleosome assembly | Q99733    | 1 | 1 |
| NUCG_HUMAN Endonuclease G, mit | Q14249    | 1 | 1 |
| O00327-2                       | O00327    | 1 | 1 |
| O15164-2                       | O15164    | 1 | 1 |
| O60536 Antigen NY-CO-43.       | O60536    | 1 | 1 |
| O76074-2                       | O76074    | 1 | 1 |
| ODCI_HUMAN Ornithine decarboxy | O14977    | 1 | 1 |
| OPN3_HUMAN Opsin 3 (Encephalop | Q9H1Y3    | 1 | 1 |
| P11277-3                       | P11277    | 1 | 1 |
| P2Y6_HUMAN P2Y purinoceptor 6  | Q15077    | 1 | 1 |
| P35813-2                       | P35813    | 1 | 1 |
| P36542-2                       | P36542    | 1 | 1 |

|                                |           |   |   |
|--------------------------------|-----------|---|---|
| P53814-2                       | P53814    | 1 | 1 |
| PA24_HUMAN Cytosolic phospholi | P47712    | 1 | 1 |
| PCB2_HUMAN Poly(rC)-binding pr | Q15366    | 1 | 1 |
| PDA4_HUMAN Protein disulfide i | P13667    | 1 | 1 |
| PDZ and LIM domain 2; mystiqu  | NP_067643 | 1 | 1 |
| PEND_HUMAN Pendrin (Sodium-ind | O43511    | 1 | 1 |
| peroxisomal biogenesis factor  | NP_542393 | 1 | 1 |
| phosphoinositol 4-phosphate a  | NP_116028 | 1 | 1 |
| PIGL_HUMAN N-acetylglucosaminy | Q9Y2B2    | 1 | 1 |
| POR1_HUMAN Voltage-dependent a | P21796    | 1 | 1 |
| PPP6_HUMAN Serine/threonine pr | O00743    | 1 | 1 |
| protein containing CXXC domai  | NP_115979 | 1 | 1 |
| protocadherin gamma subfamily  | NP_115268 | 1 | 1 |
| Prp5-like DEAD-box protein; R  | NP_055644 | 1 | 1 |
| PSA4_HUMAN Proteasome subunit  | P25789    | 1 | 1 |
| PSDB_HUMAN 26S proteasome non- | O00231    | 1 | 1 |
| PYC_HUMAN Pyruvate carboxylase | P11498    | 1 | 1 |
| pyrroline 5-carboxylate reduc  | NP_037460 | 1 | 1 |
| Q08379-2                       | Q08379    | 1 | 1 |
| Q13243-2                       | Q13243    | 1 | 1 |
| Q13945 3',5'-cyclic AMP phosph | Q13945    | 1 | 1 |
| Q14028-2                       | Q14028    | 1 | 1 |
| Q14297 Fetal beta-MHC binding  | Q14297    | 1 | 1 |
| Q15173-2                       | Q15173    | 1 | 1 |
| Q15257-4                       | Q15257    | 1 | 1 |
| Q15276 Rabaptin-5.             | Q15276    | 1 | 1 |
| Q15303-2                       | Q15303    | 1 | 1 |
| Q15646-2                       | Q15646    | 1 | 1 |
| Q86TT5 Human full-length cDNA  | Q86TT5    | 1 | 1 |
| Q86XI8 Hypothetical protein.   | Q86XI8    | 1 | 1 |
| Q8IU56 Histamine N-methyltrans | Q8IU56    | 1 | 1 |
| Q8IUZ3 Hypothetical protein.   | Q8IUZ3    | 1 | 1 |
| Q8IVH8-3                       | Q8IVH8    | 1 | 1 |
| Q8IWG8 Similar to RIKEN cDNA 2 | Q8IWG8    | 1 | 1 |
| Q8N3D7 Hypothetical protein.   | Q8N3D7    | 1 | 1 |
| Q8N432 Similar to RIKEN cDNA 2 | Q8N432    | 1 | 1 |
| Q8N8W9 Hypothetical protein FL | Q8N8W9    | 1 | 1 |
| Q8NAS8 Hypothetical protein FL | Q8NAS8    | 1 | 1 |
| Q8NH34 Seven transmembrane hel | Q8NH34    | 1 | 1 |
| Q8NHD2 SREC-5.                 | Q8NHD2    | 1 | 1 |
| Q8NHU2-4                       | Q8NHU2    | 1 | 1 |
| Q8TAM2-2                       | Q8TAM2    | 1 | 1 |
| Q8TEH2 FLJ00225 protein (Fragm | Q8TEH2    | 1 | 1 |

|                                       |               |          |          |
|---------------------------------------|---------------|----------|----------|
| Q8TEL7 FLJ00176 protein (Fragm        | Q8TEL7        | 1        | 1        |
| Q8WWQ5 Mucin 5 (Fragment).            | Q8WWQ5        | 1        | 1        |
| Q96CH5 Hypothetical protein (F        | Q96CH5        | 1        | 1        |
| Q96D19 DKFZP434A043 protein.          | Q96D19        | 1        | 1        |
| Q96RF1 HEJ1.                          | Q96RF1        | 1        | 1        |
| Q99463 Y6 encoding protein.           | Q99463        | 1        | 1        |
| Q99996-4                              | Q99996        | 1        | 1        |
| Q9BT24 Hypothetical protein.          | Q9BT24        | 1        | 1        |
| Q9H3B6 PRO1292.                       | Q9H3B6        | 1        | 1        |
| Q9H3C4 PRO0753.                       | Q9H3C4        | 1        | 1        |
| Q9H5Z4 Hypothetical protein FL        | Q9H5Z4        | 1        | 1        |
| Q9H8E8-2                              | Q9H8E8        | 1        | 1        |
| Q9NPT4 Hypothetical protein.          | Q9NPT4        | 1        | 1        |
| Q9P281 Hypothetical protein KI        | Q9P281        | 1        | 1        |
| Q9UGU0-2                              | Q9UGU0        | 1        | 1        |
| Q9ULM3 Hypothetical protein KI        | Q9ULM3        | 1        | 1        |
| Q9UM12 CaC-1 protein (Fragment        | Q9UM12        | 1        | 1        |
| Q9UPX8-2                              | Q9UPX8        | 1        | 1        |
| RAB guanine nucleotide exchan         | NP_055319     | 1        | 1        |
| rabconnectin-3 [Homo sapiens]         | NP_056078     | 1        | 1        |
| <b>RAC1_HUMAN Ras-related C3 botu</b> | <b>P15154</b> | <b>1</b> | <b>1</b> |
| RAN_HUMAN GTP-binding nuclear         | P17080        | 1        | 1        |
| rap2 interacting protein x [H         | NP_055776     | 1        | 1        |
| RB10_HUMAN Ras-related protein        | O88386        | 1        | 1        |
| RB2A_HUMAN Ras-related protein        | P08886        | 1        | 1        |
| RB-associated KRAB repressor          | NP_066986     | 1        | 1        |
| RBB4_HUMAN Chromatin assembly         | Q09028        | 1        | 1        |
| RM49_HUMAN Mitochondrial 60s r        | Q13405        | 1        | 1        |
| RP1_HUMAN Oxygen-regulated pro        | P56715        | 1        | 1        |
| RP38_HUMAN Ribonuclease P prot        | P78345        | 1        | 1        |
| RPA1_HUMAN DNA-directed RNA po        | O95602        | 1        | 1        |
| RS15_HUMAN 40S ribosomal prote        | P11174        | 1        | 1        |
| RSP4_HUMAN 40S ribosomal prote        | P08865        | 1        | 1        |
| RT30_HUMAN Mitochondrial 28S r        | Q9NP92        | 1        | 1        |
| RT31_HUMAN 28S ribosomal prote        | Q92665        | 1        | 1        |
| RUXE_HUMAN Small nuclear ribon        | P08578        | 1        | 1        |
| S10P_HUMAN S-100P protein             | P25815        | 1        | 1        |
| S143_HUMAN SEC14-like protein         | Q9UDX4        | 1        | 1        |
| S3A3_HUMAN Splicing factor 3A         | Q12874        | 1        | 1        |
| sema domain, immunoglobulin d         | NP_060259     | 1        | 1        |
| sequestosome 1; ubiquitin-bin         | NP_003891     | 1        | 1        |
| SERA_HUMAN D-3-phosphoglycerat        | O43175        | 1        | 1        |
| SH2 domain containing phospho         | NP_110391     | 1        | 1        |

|                                |           |   |   |
|--------------------------------|-----------|---|---|
| SIAS_HUMAN Sialic acid synthas | Q9NR45    | 1 | 1 |
| single Ig IL-1R-related molec  | NP_068577 | 1 | 1 |
| SMD1_HUMAN Small nuclear ribon | P13641    | 1 | 1 |
| SNG4_HUMAN Synaptogyrin 4      | O95473    | 1 | 1 |
| SPA1_HUMAN Signal-induced prol | Q96FS4    | 1 | 1 |
| SPB7_HUMAN Megsin (TP55) (Serp | O75635    | 1 | 1 |
| SPCA_HUMAN Spectrin alpha chai | P02549    | 1 | 1 |
| SPOP_HUMAN Speckle-type POZ pr | O43791    | 1 | 1 |
| SR54_HUMAN Signal recognition  | P13624    | 1 | 1 |
| SRp25 nuclear protein; HSVI b  | NP_057722 | 1 | 1 |
| SSRD_HUMAN Translocon-associat | P51571    | 1 | 1 |
| STE20-like kinase; STE2-like   | NP_057365 | 1 | 1 |
| steroid-sensitive protein 1 [  | NP_840058 | 1 | 1 |
| STKA_HUMAN Serine/threonine pr | O94804    | 1 | 1 |
| suppressor of var1, 3-like 1   | NP_003162 | 1 | 1 |
| SYD_HUMAN Aspartyl-tRNA synthe | P14868    | 1 | 1 |
| SYK_HUMAN Lysyl-tRNA synthetas | Q15046    | 1 | 1 |
| synovial sarcoma, X breakpoin  | NP_003138 | 1 | 1 |
| synovial sarcoma, X breakpoin  | NP_054740 | 1 | 1 |
| SZ07_HUMAN Platelet basic prot | P02775    | 1 | 1 |
| T150_HUMAN Thyroid hormone rec | Q9Y2W1    | 1 | 1 |
| T2D6_HUMAN Transcription initi | Q15545    | 1 | 1 |
| T2D7_HUMAN Transcription initi | Q16594    | 1 | 1 |
| TCPD_HUMAN T-complex protein 1 | P50991    | 1 | 1 |
| tectorin alpha precursor; Tec  | NP_005413 | 1 | 1 |
| testis expressed sequence 11   | NP_112566 | 1 | 1 |
| TGM1_HUMAN Protein-glutamine g | P22735    | 1 | 1 |
| THIM_HUMAN 3-ketoacyl-CoA thio | P42765    | 1 | 1 |
| TIAM_HUMAN T-lymphoma invasion | Q13009    | 1 | 1 |
| transport-secretion protein 2  | NP_065109 | 1 | 1 |
| TRPS_HUMAN Zinc finger transcr | Q9UHF7    | 1 | 1 |
| TSP3_HUMAN Thrombospondin 3 pr | P49746    | 1 | 1 |
| UBCM_HUMAN Ubiquitin-conjugati | O76069    | 1 | 1 |
| UBP5_HUMAN Ubiquitin carboxyl- | P45974    | 1 | 1 |
| UCR2_HUMAN Ubiquinol-cytochrom | P22695    | 1 | 1 |
| UCR6_HUMAN Ubiquinol-cytochrom | P14927    | 1 | 1 |
| UPF3 regulator of nonsense tr  | NP_075386 | 1 | 1 |
| usherin [Homo sapiens]         | NP_009054 | 1 | 1 |
| VAB2_HUMAN Vacuolar ATP syntha | P21281    | 1 | 1 |
| WNT1 inducible signaling path  | NP_543028 | 1 | 1 |
| Wolf-Hirschhorn syndrome cand  | NP_015627 | 1 | 1 |
| Y419_HUMAN Hypothetical protei | O43303    | 1 | 1 |
| YN01_HUMAN Hypothetical protei | P59074    | 1 | 1 |

|                                |        |   |   |
|--------------------------------|--------|---|---|
| Z151_HUMAN Zinc finger protein | Q13105 | 1 | 1 |
| ZDH7_HUMAN Zinc finger DHHC do | Q9NXF8 | 1 | 1 |
